# Supplementary material for: Controllable preparation of ZnII coordination polymers: unusual solvothermal formation of a LiGe-type framework directed by in situ S–S coupling of 5-(4-pyridyl)-1H-1,2,4-triazole-3-thiol
Source: Royal Society of Chemistry journal article supplement (doi:10.1039/b716461k), 2008-01-01
Supplement: b716461k.pdf [file b716461k.pdf]

*Electronic Supplementary Information (ESI) for*

**Controllable preparation of Zn<sup>II</sup> coordination polymers: unusual solvothermal formation of a LiGe-type framework directed by *in situ* S–S coupling of 5-(4-pyridyl)-1*H*-1,2,4-triazole-3-thiol**

Xu-Dong Chen, Hui-Fang Wu and Miao Du\*

*College of Chemistry and Life Science, Tianjin Normal University, Tianjin 300387, P. R. China*

*E-mail: dumiao@public.tpt.tj.cn*

***Experimental***

**Single-crystal X-ray diffraction determination and refinement**

X-ray single-crystal diffraction data for all compounds were collected on a Bruker Apex II CCD diffractometer at 293(2) K. In each case, a semi-empirical absorption correction was applied with SADABS and the SAINT program was used for integration of the diffraction profiles. The structure was solved by direct methods with the SHELXS program of SHELXTL package and refined with SHELXL. The final refinement was performed by full-matrix least-squares methods on  $F^2$  with anisotropic thermal parameters for all non-H atoms. As a rule, H atoms of C were located geometrically and allowed to ride during the subsequent refinement. N- and O-bound H atoms were first placed in difference Fourier maps and then treated by using a riding model.

In the structural refinement of complex **1**, the lattice water of O5 was assigned to half occupancy to achieve the appropriate thermal parameter. In the case of **2**, the lattice water was disordered over five sites with isotropic refinement for most of them and thus, the affiliated hydrogen atoms were not located.

*Crystal data* for Hptt: C<sub>7</sub>H<sub>6</sub>N<sub>4</sub>S (*Mr* = 178.22), monoclinic, *C2/c*, *a* = 26.767(4), *b* = 3.9631(6), *c* = 17.583(3) Å,  $\beta$  = 125.024(2)°, *V* = 1527.5(4) Å<sup>3</sup>, *Z* = 8,  $\mu$  = 0.364 mm<sup>-1</sup>, *S* = 1.035, *R* = 0.0318 and *wR* = 0.0746. *Crystal data* for H<sub>2</sub>dptt·2H<sub>2</sub>O: C<sub>14</sub>H<sub>14</sub>N<sub>8</sub>O<sub>2</sub>S<sub>2</sub> (*Mr* = 390.45), monoclinic, *P2<sub>1</sub>/n*, *a* = 15.643(2), *b* = 7.658(1), *c* = 15.707(2) Å,  $\beta$  = 108.450(2)°, *V* = 1784.8(4) Å<sup>3</sup>, *Z* = 4,  $\mu$  = 0.326 mm<sup>-1</sup>, *S* = 1.040, *R* = 0.0463 and *wR* = 0.1103. *Crystal data* for H<sub>2</sub>dptt·2CH<sub>3</sub>CN (*Mr* = 436.52): monoclinic, *C2/c*, *a* = 7.713(3), *b* = 16.871(7), *c* = 16.121(7) Å,  $\beta$  = 91.764(7)°, *V* = 2097(2) Å<sup>3</sup>, *Z* = 4,  $\mu$  = 0.282 mm<sup>-1</sup>, *S* = 1.009, *R* = 0.0361 and *wR* = 0.0825.

### Crystallization of Hptt, H<sub>2</sub>dptt·2H<sub>2</sub>O and H<sub>2</sub>dptt·2CH<sub>3</sub>CN

**Hptt:** A CH<sub>3</sub>OH (10 ml) solution of Hptt (8.9 mg, 0.05 mmol) was carefully layered onto a water solution (10 ml) of AgNO<sub>3</sub> (8.5 mg, 0.05 mmol) in a straight glass tube. Strip colorless crystals of Hptt were collected after one week.

**H<sub>2</sub>dptt·2H<sub>2</sub>O:** A solution of Co(ClO<sub>4</sub>)<sub>2</sub>·6H<sub>2</sub>O (18.2 mg, 0.05 mmol) in CH<sub>3</sub>CN (5 ml) was added to an aqueous solution (5 ml) of Hptt (8.9 mg, 0.05 mmol), and the mixture was further stirred at *ca.* 70 °C for 2 h. The orange solution was left to stand at room temperature, giving colorless block crystals of H<sub>2</sub>dptt·2H<sub>2</sub>O after several days.

**H<sub>2</sub>dptt·2CH<sub>3</sub>CN:** Hptt (3.6 mg, 0.02 mmol) and Co(ClO<sub>4</sub>)<sub>2</sub>·6H<sub>2</sub>O (7.2 mg, 0.02 mmol) were mixed in CH<sub>3</sub>CN (10 ml) with stir and then left to stand. Colorless block crystals of H<sub>2</sub>dptt·2CH<sub>3</sub>CN were obtained after one week. IR (cm<sup>-1</sup>): 3033m, 2964w, 2804m, 2318w, 1586vs, 1548m, 1519s, 1454s, 1415m, 1231vs, 1127w, 1077w, 1005m, 976m, 875m, 832vs, 738w, 699s, 667w, 546m.

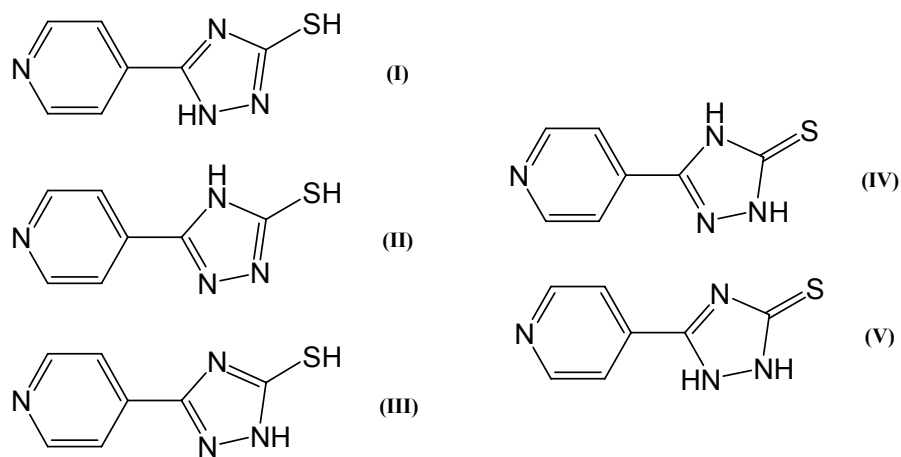

**Chart S1 Potential tautomers of Hptt**

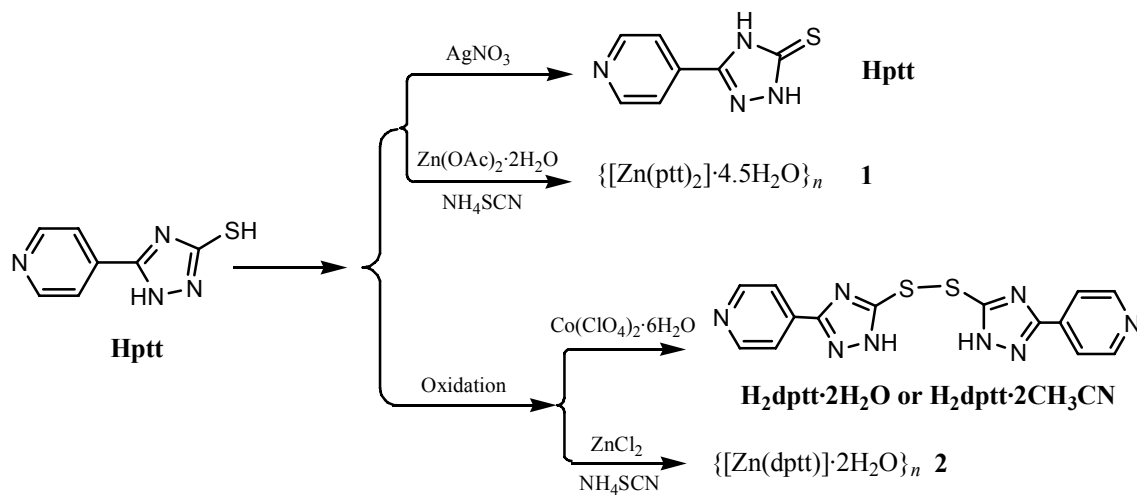

**Scheme S1**

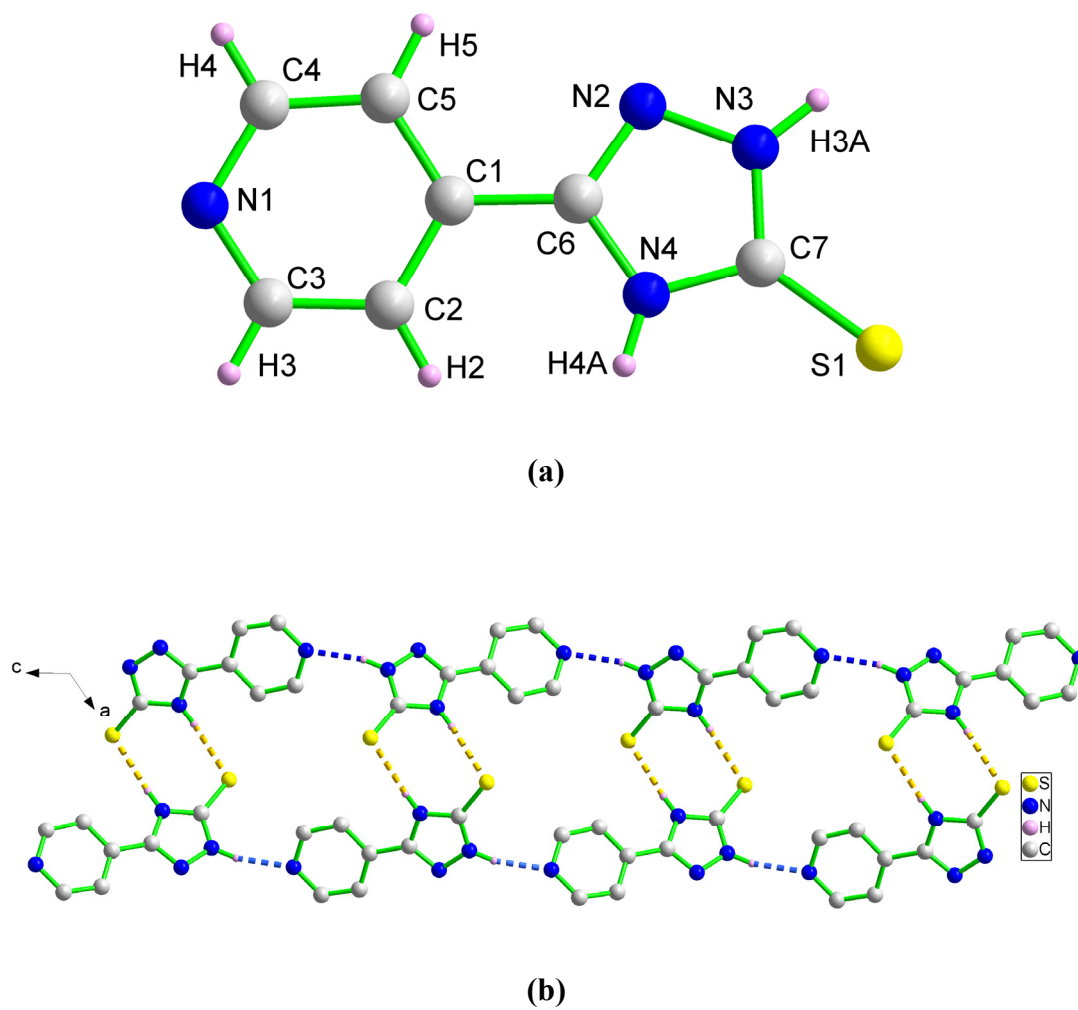

**Fig. S1** (a) Molecular structure of the free ligand Hptt that exists in thione form. (b) 1-D hydrogen-bonding tape in the structure of Hptt.

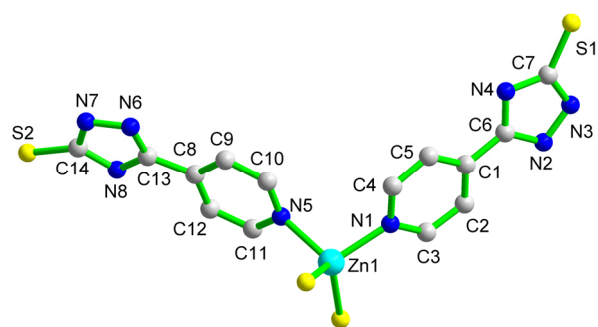

(a)

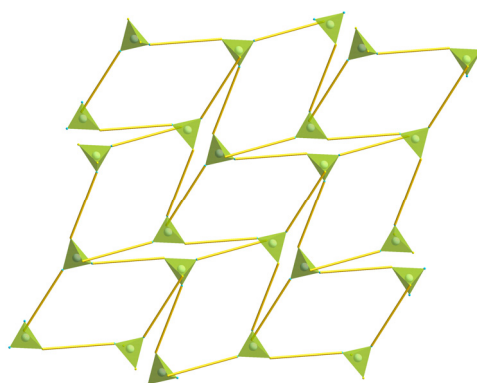

(b)

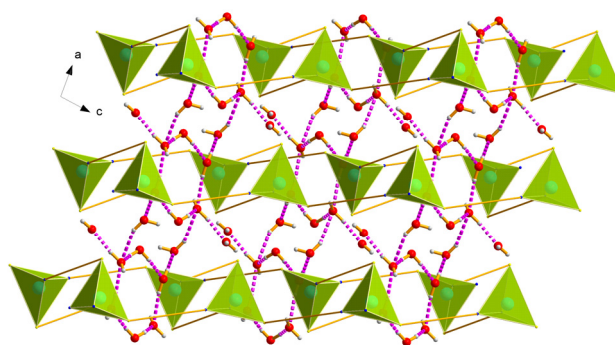

(c)

**Fig. S2** (a) A portion view of **1** with atom labeling of the asymmetric unit. (b) A schematic representation of the (4,4) network in **1**, in which the tetrahedral Zn<sup>II</sup> nodes (green polyhedra) are bridged by ptt ligands (yellow rods). (c) 3-D pseudo-polyrotaxane supramolecular architecture of **1** viewed along the [010] direction.

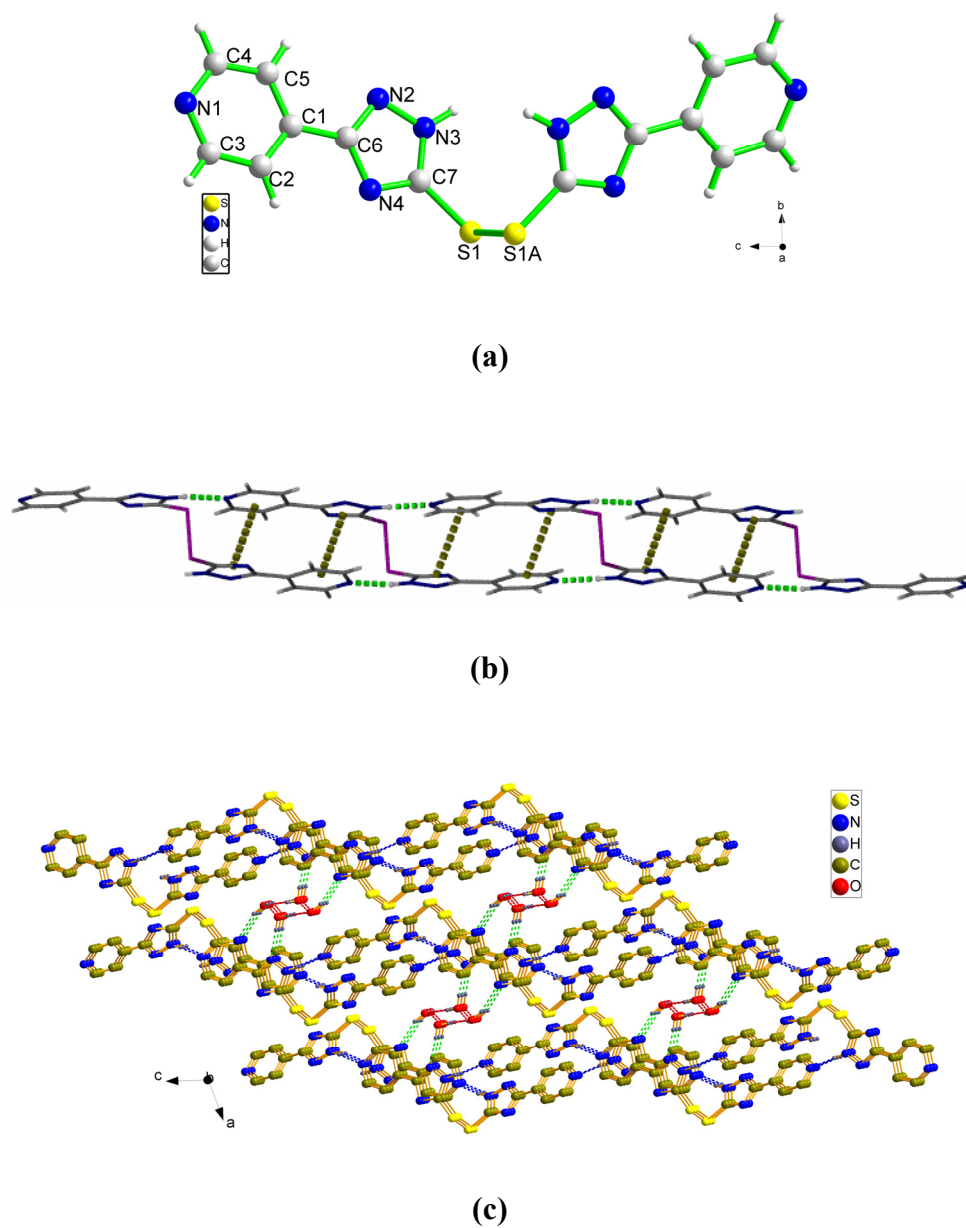

**Fig. S3** (a) Molecular structure of H<sub>2</sub>dptt in H<sub>2</sub>dptt·2CH<sub>3</sub>CN. Symmetry code for A:  $-x, y, -z + 1/2$ . (b) 1-D supramolecular array in both *pseudo*-polymorphs of H<sub>2</sub>dptt, in which the N–H···N and  $\pi$ – $\pi$  stacking interactions are shown as green and brown broken lines. (c) A perspective view of the 3-D hydrogen-bonding network in H<sub>2</sub>dptt·2H<sub>2</sub>O.

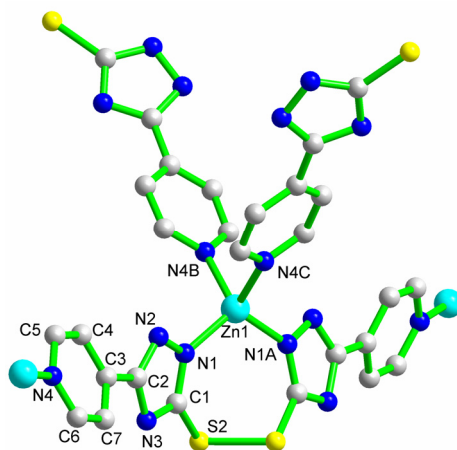

(a)

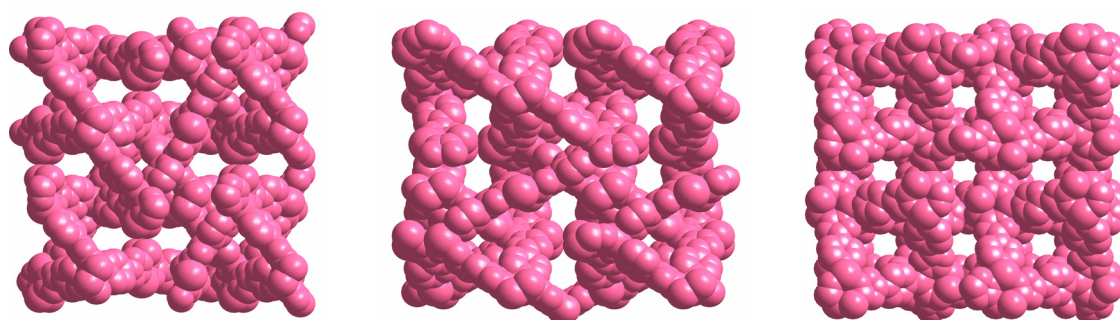

(b)

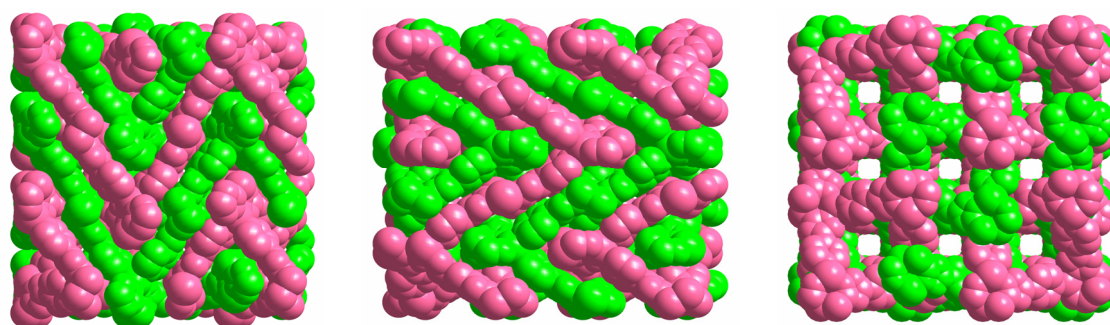

(c)

**Fig. S4** (a) A portion view of **2** with atom labeling, showing the coordination sphere of  $\text{Zn}^{\text{II}}$  and the binding fashion of dptt. Symmetry codes for A:  $-x + 1/2, y, -z$ ; B:  $y - 1/4, x - 1/4, z - 1/4$ ; C:  $-y + 3/4, x - 1/4, -z + 1/4$ . (b) Packing diagram of a single **lig** net in **2**, showing channels along *a*, *b*, and *c* axes. (c) Packing diagram of **2** (2-fold interpenetration) along *a*, *b*, and *c* directions, in which the water guests are omitted for clarity.

**Table S1** Possible hydrogen-bonding geometries (Å, °)

| Compound                                   | D–H...A                  | D...A    | H...A | D–H...A |
|--------------------------------------------|--------------------------|----------|-------|---------|
| <b>Hptt</b>                                | N3–H3A...N1 <sup>a</sup> | 2.888(3) | 2.01  | 164     |
|                                            | N4–H4A...S1 <sup>b</sup> | 3.253(2) | 2.38  | 175     |
| <b>1</b>                                   | O2–H2A...O5 <sup>c</sup> | 2.529(7) | 1.94  | 126     |
|                                            | O2–H2B...O2 <sup>d</sup> | 2.914(5) | 2.43  | 117     |
|                                            | O3–H3B...O2 <sup>e</sup> | 2.744(5) | 1.89  | 179     |
|                                            | O4–H4A...O3 <sup>f</sup> | 3.124(6) | 2.35  | 152     |
|                                            | O5–H5A...O3 <sup>d</sup> | 2.880(9) | 2.04  | 170     |
|                                            | O5–H5B...O4 <sup>g</sup> | 2.757(8) | 1.91  | 176     |
|                                            | O3–H3A...O1 <sup>e</sup> | 2.613(5) | 1.90  | 141     |
|                                            | O1–H1A...N8 <sup>h</sup> | 2.838(4) | 1.99  | 177     |
|                                            | O1–H1B...S1 <sup>g</sup> | 3.380(4) | 2.58  | 156     |
|                                            | N3–H3'...O2 <sup>c</sup> | 2.768(4) | 1.93  | 164     |
|                                            | O4–H4B...N2 <sup>g</sup> | 2.979(5) | 2.25  | 144     |
|                                            | N7–H7...N4 <sup>i</sup>  | 2.962(4) | 2.13  | 163     |
| <b>H<sub>2</sub>dptt·2H<sub>2</sub>O</b>   | N2–H2...N8 <sup>j</sup>  | 2.782(4) | 1.93  | 172     |
|                                            | N6–H6'...N4 <sup>k</sup> | 2.723(4) | 1.86  | 178     |
|                                            | O1–H1A...N7 <sup>l</sup> | 2.944(4) | 2.13  | 162     |
|                                            | O1–H1B...O2              | 2.654(7) | 1.90  | 147     |
|                                            | O2–H2A...O1 <sup>m</sup> | 2.678(6) | 1.83  | 178     |
|                                            | O2–H2B...N5 <sup>k</sup> | 2.914(5) | 2.06  | 176     |
| <b>H<sub>2</sub>dptt·2CH<sub>3</sub>CN</b> | N3–H3A...N1 <sup>n</sup> | 2.802(3) | 1.89  | 173     |

<sup>a</sup>  $x, -y + 1, z - 1/2$ . <sup>b</sup>  $-x, y, -z + 1/2$ . <sup>c</sup>  $x - 1/2, -y + 3/2, z + 1/2$ . <sup>d</sup>  $-x + 1, -y + 1, -z + 1$ . <sup>e</sup>  $x + 1/2, -y + 1/2, z + 1/2$ . <sup>f</sup>  $-x + 3/2, y + 1/2, -z + 3/2$ . <sup>g</sup>  $x + 1/2, -y + 3/2, z - 1/2$ . <sup>h</sup>  $x + 1/2, -y + 1/2, z - 1/2$ . <sup>i</sup>  $-x, -y + 1, -z + 1$ . <sup>j</sup>  $-x + 1, -y + 3, -z + 2$ . <sup>k</sup>  $-x + 1, -y + 2, -z + 1$ . <sup>l</sup>  $x, y, z - 1$ . <sup>m</sup>  $-x + 3/2, y - 1/2, -z + 1/2$ . <sup>n</sup>  $x - 1/2, -y + 3/2, z - 1/2$ .

**Symmetry codes in Fig. 1c:** A:  $-x + 1, -y + 1, -z + 1$ ; B:  $-x + 3/2, y + 1/2, -z + 3/2$ ; C:  $x - 1/2, -y + 3/2, z + 1/2$ ; D:  $-x + 1/2, y + 1/2, -z + 3/2$ ; E:  $-x, -y + 1, -z + 1$ ; F:  $-x + 1/2, y - 1/2, -z + 1/2$ ; G:  $x - 1/2, -y + 1/2, z - 1/2$ ; H:  $-x + 3/2, y - 1/2, -z + 1/2$ .
